# Supplementary material
Source: PubMed Central journal article supplement (PMC10524087)
Supplement: NIHMS1897288-supplement-Supplementary_Materials__figures__tables.pdf [file NIHMS1897288-supplement-Supplementary_Materials__figures__tables.pdf]

## **Supplemental Material for**

# **“Neurobiology and long-term impact of bladder filling pain in humans: a MAPP research network study”**

Andrew D Schrepf, Ishtiaq Mawla, Bruce D Naliboff, Bob Gallop, Robert M Moldwin, Frank Tu, Priyanka Gupta, Steven Harte, John N Krieger, Claire Yang, Catherine Bradley, Larissa Rodriguez, David Williams, Vincent Magnotta, Eric Ichesco, Richard E Harris, Quentin Clemens, Chris Mullins, Jason J Kutch

## **Table of Contents**

1. Supplemental Figure 1: effect of fMRI motion criteria
2. Supplemental Table 1: predictor variables for pelvic pain severity

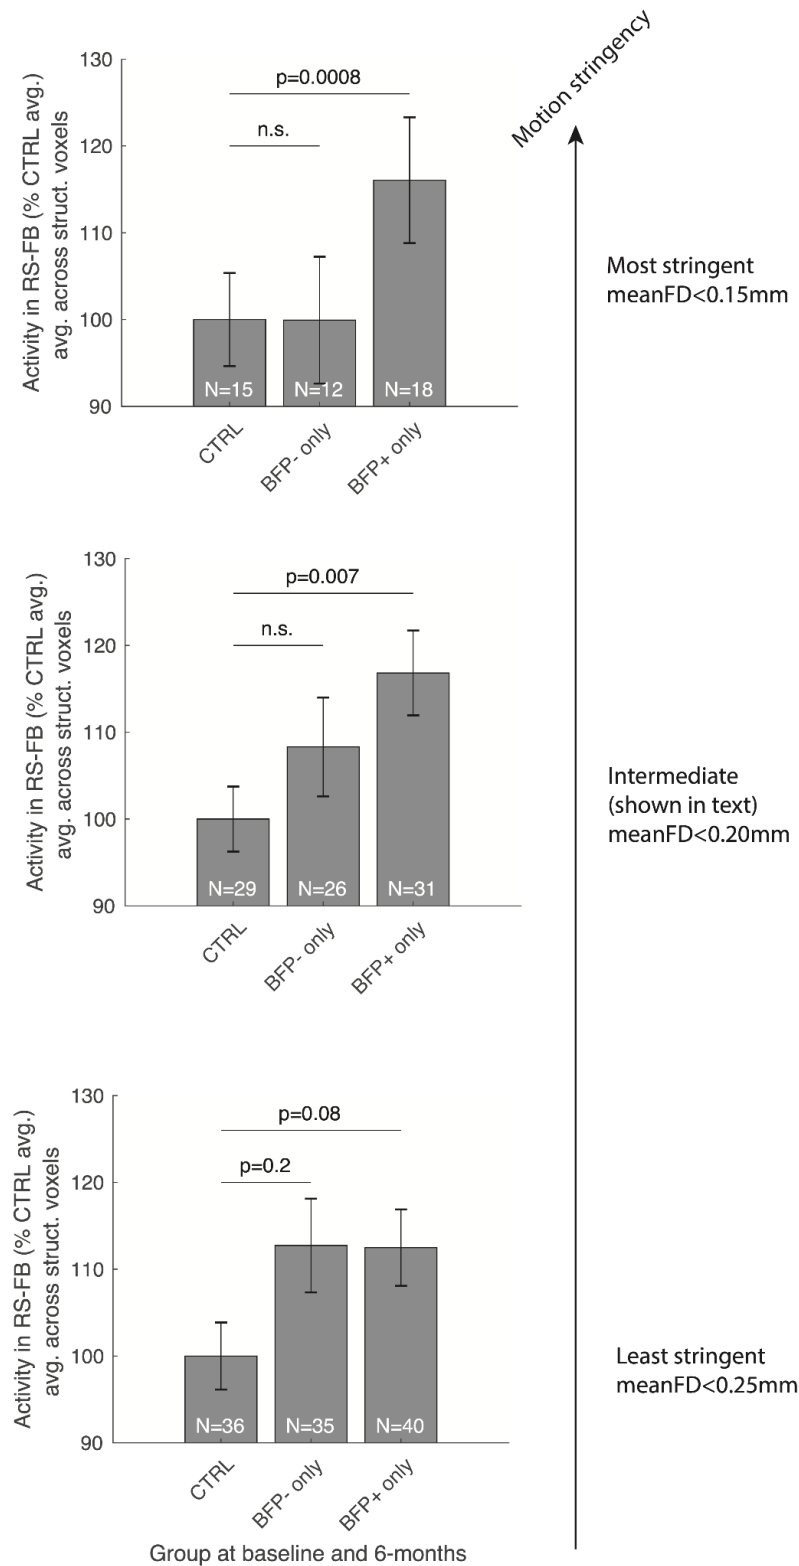

**Supplemental Figure 1:** Sensitivity of increase in cortical activity (Figure 4D) to stringency of motion cutoff: mean framewise displacement (meanFD), meanFD < 0.25, < 0.20, < 0.15. Difference between BFP+ and controls is stable, difference between BFP- and controls varies but disappears as motion requirement is more stringent.

**Supplemental Table 1.** Eta<sup>2</sup> values for each predictor variable in the analysis of genitourinary pain severity.

| Variable                 | Partial eta-squared |
|--------------------------|---------------------|
| RICE painful filling     | 0.024               |
| Rice painful urgency     | 0.029               |
| sex                      | 0.000               |
| <b>class</b>             | <b>0.120</b>        |
| age                      | 0.025               |
| Widespread pain          | 0.015               |
| Symptom duration         | 0.015               |
| Urinary symptom severity | 0.082               |
